# Supplementary material for: Poly(ionic liquid)-based monodisperse microgels as a unique platform for producing functional materials
Source: Royal Society of Chemistry journal article supplement (doi:10.1039/c4tc02487g), 2014-11-28
Supplement: c4tc02487g1.pdf [file c4tc02487g1.pdf]

## Supporting Information

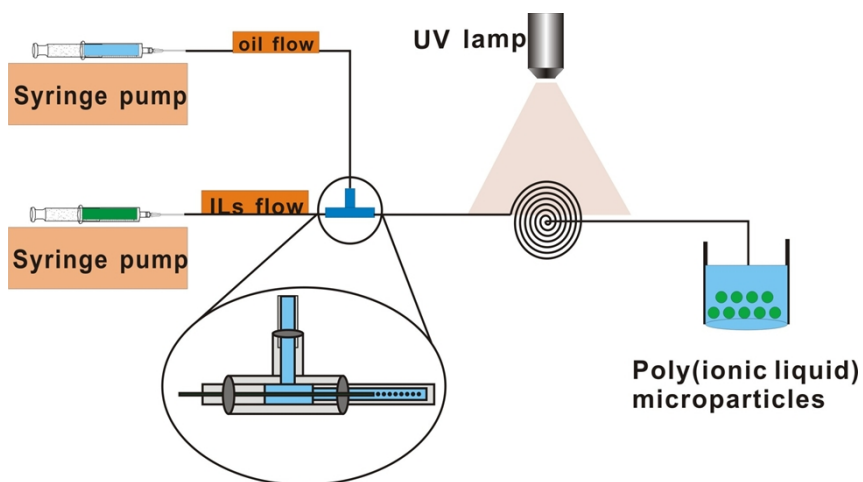

Ionic Liquid Monomer:

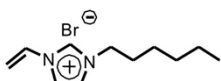

Cross-Linker:

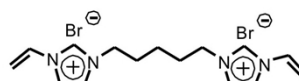

**Scheme S1:** Schematic illustration of the microfluidic synthesis of the monodisperse PIL microgels and the chemical structures of the used ionic liquid monomer and cross-linker.

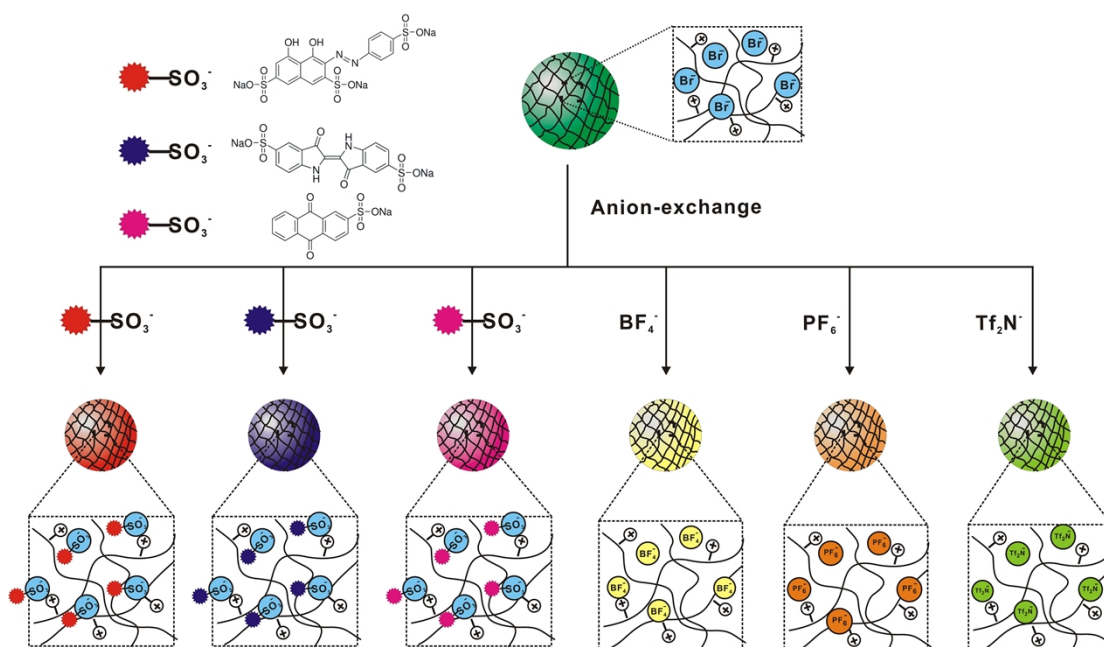

**Scheme S2:** Schematic illustration of the counteranion-exchange reaction of the prepared PIL microgels.

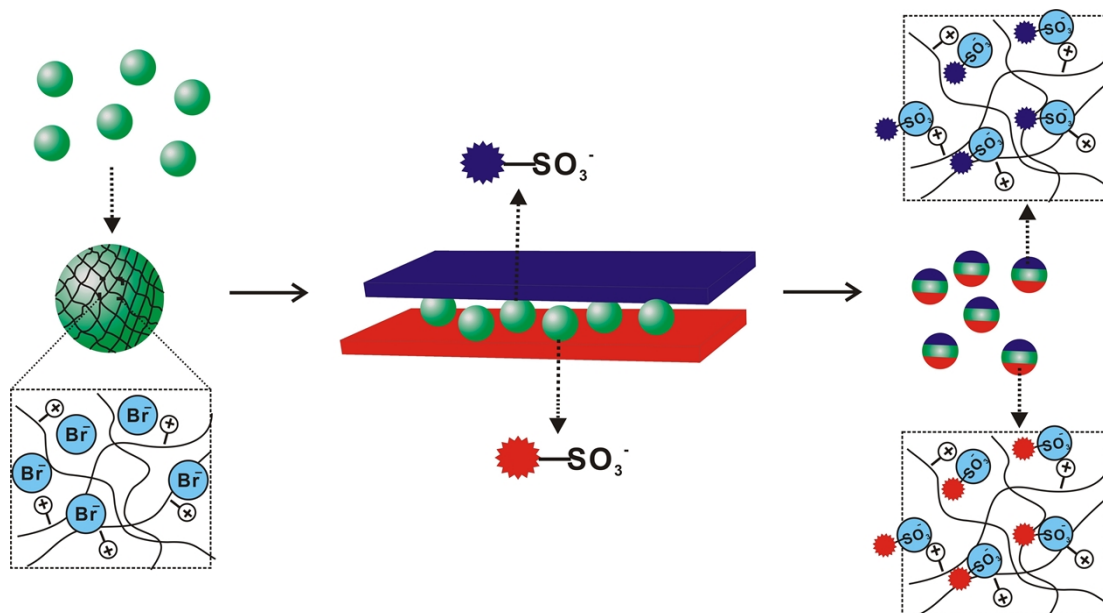

**Scheme S3:** Schematic illustration of the preparation of patchy microparticles by using a “sandwich” microcontact printing ( $\mu$ CP) method.

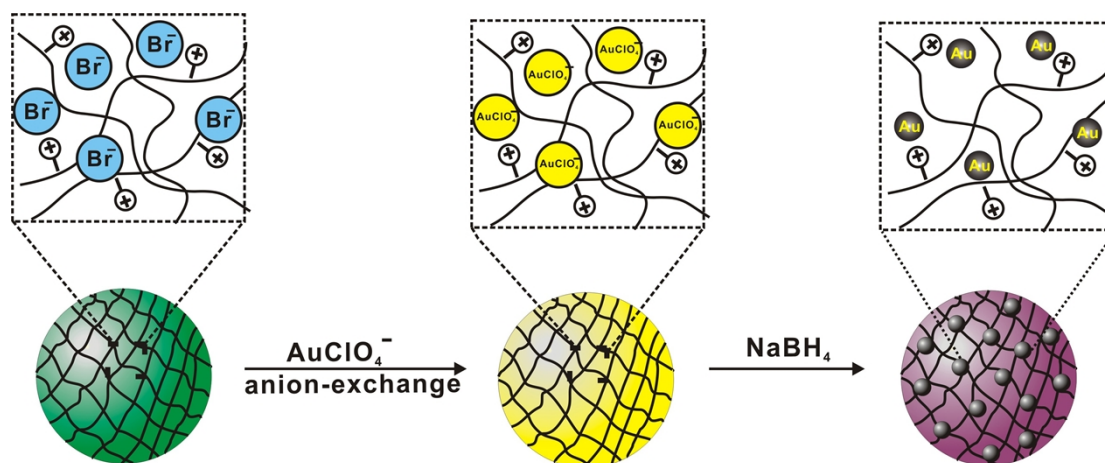

**Scheme S4:** Schematic representation of the preparation of Au-PIL hybrid microgels..

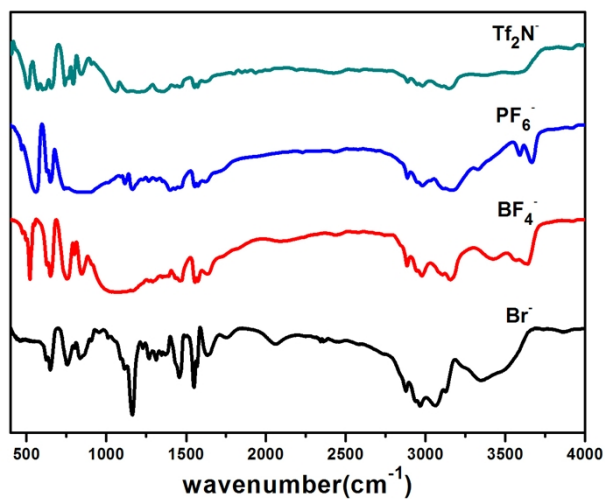

**Figure S1.** FTIR spectra of the fabricated PIL microgels before and after the exposure to different anion aqueous solutions.

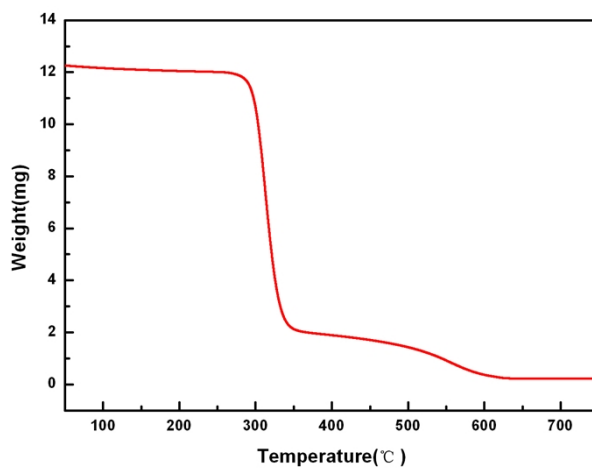

**Figure S2.** TGA data of the Au-PIL hybrid microgels with a heating rate 5K/min in a flow of air.

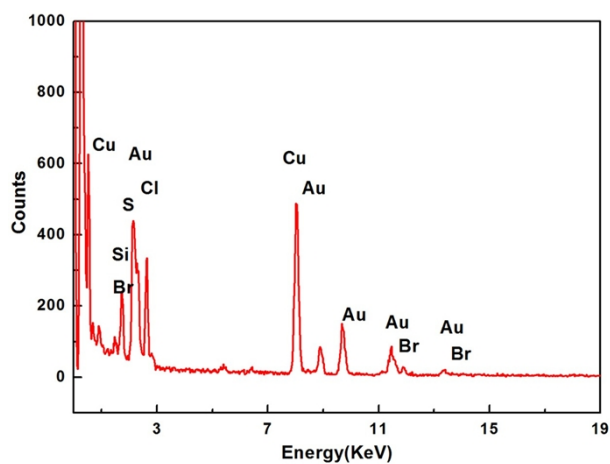

**Figure S3:** EDX spectrum of Au-PIL hybrid microgels.
